# Supplementary material
Source: PubMed Central journal article supplement (PMC2879806)
Supplement: pp.110.155796_1.pdf [file pp.110.155796_1.pdf]

**Supplementary Table S1. List of primers that were used.**

List of primers used in plasmid construction, virus detection and RT-PCR.

**Table S1**

| <b>Name</b>    | <b>Sequences (5'-3')</b>                     | <b>Brief Description</b>   |
|----------------|----------------------------------------------|----------------------------|
| <b>OYLT97</b>  | CGGAAGCTTGTCTGACTGGCGGCCG<br>CTCTAGTGGATC    | For CbLCV DNA-A<br>cloning |
| <b>OYLT98</b>  | CGGGTTCGACATAGAACGCCACGGG<br>GCATC           |                            |
| <b>Oligo A</b> | CTGCAAGGCGATTAAGTTGGGTAA<br>C                | For all amiRNA cloning     |
| <b>Oligo B</b> | GCGGATAACAATTTACACAGGAA<br>ACAG              |                            |
| <b>OTY14</b>   | GATCAACATAGACTGATTGGGGCTC<br>TCTCTTTTGTATTCC | For amiR-PDS cloning       |
| <b>OTY15</b>   | GAGCCCAATCAGTCTATGTTGATC<br>AAAGAGAATCAATGA  |                            |
| <b>OTY16</b>   | GAGCACCATCAGTCAATGTTGTTC<br>ACAGGTCGTGATATG  |                            |
| <b>OTY17</b>   | GAACAACATTGACTGATTGGTGCTC<br>TACATATATATTCCT |                            |
| <b>OTY42</b>   | GATAAGATCTAACCGTGGCGCACTC<br>TCTCTTTTGTATTCC |                            |
| <b>OTY43</b>   | GAGTGCGCCACGGTTAGATCTTATC<br>AAAGAGAATCAATGA |                            |
| <b>OTY44</b>   | GAGTACGCCACGGTTTGATCTTTTC<br>ACAGGTCGTGATATG |                            |
| <b>OTY45</b>   | GAAAAGATCAAACCGTGGCGTACT<br>CTACATATATATTCCT |                            |
| <b>OWF4I</b>   | GATGTATCTGAAACAACCTGGTGTC<br>TCTCTTTTGTATTCC | For amiR-CLA1 cloning      |
| <b>OWF5II</b>  | GACACCAAGTTGTTTCAGATACATC<br>AAAGAGAATCAATGA |                            |
| <b>OWF6III</b> | GACAACAAGTTGTTTGAGATACTTC<br>ACAGGTCGTGATATG |                            |
| <b>OWF7IV</b>  | GAAGTATCTCAAACAACCTGTTGTC<br>TAACTATATATTCCT |                            |
| <b>OTY34</b>   | GATCGGTGCTAAACTAGCACCAGT<br>CTCTCTTTTGTATTCC | For amiR-SGT1 cloning      |
| <b>OTY35</b>   | GACTGGTGCTAGTTTAGCACCGATC<br>AAAGAGAATCAATGA |                            |
| <b>OTY36</b>   | GACTAGTGCTAGTTTTGCACCGTTC<br>ACAGGTCGTGATATG |                            |

|               |                                                            |                                                                        |
|---------------|------------------------------------------------------------|------------------------------------------------------------------------|
| <b>OTY37</b>  | GAACGGTGCAAACTAGCACTAGT<br>CTACATATATATTCCT                |                                                                        |
| <b>OTY77</b>  | ACAGTTTGATTGCCAGTCCC                                       | For CbLCV DNA<br>detection                                             |
| <b>OTY78</b>  | ACATCACTCACCCAGAAGG                                        |                                                                        |
| <b>OTY100</b> | TCTGTTTAGCCGGTTTGGTC                                       | For TMV detection                                                      |
| <b>OTY101</b> | TGCAAGCCTGATCGACATAG                                       |                                                                        |
| <b>OTY50</b>  | CGGGGTACCTCTCGCTCCTATCTAC<br>CA                            | For miR156b cloning                                                    |
| <b>OTY51</b>  | CGGTCTAGACAAGCACCCACTTCC<br>ACA                            |                                                                        |
| <b>OTY54</b>  | CGGTCTAGAATAGAAAATACTTCGT<br>TAGC                          | For miR165a cloning                                                    |
| <b>OTY55</b>  | CGGGGTACCACTCATCATTCCCTCA<br>TC                            |                                                                        |
| <b>OTY133</b> | CCTGCATGTGCTCACAGTCTTCTGT<br>CAGTTTTCTC                    | For miR156b mutaion                                                    |
| <b>OTY134</b> | AACTGACAGAAGACTGTGAGCACA<br>TGCAGGCACTG                    |                                                                        |
| <b>OTY135</b> | AACTGACAGAAAGACTGGTGAGCA<br>CGCACACGCAA                    |                                                                        |
| <b>OTY136</b> | TGCGTGCTCACCAGTCTTTCTGTCA<br>GTTGCCTATC                    |                                                                        |
| <b>OTY137</b> | GTATCCTCGGACCAGTGTTTCATCCC<br>CCCCAACATG                   |                                                                        |
| <b>OTY138</b> | TTGGGGGGGATGAACACTGGTCCG<br>AGGATACTCTC                    | For miR 165a mutation                                                  |
| <b>OTY139</b> | GTTGAGGGGAATGTTTCGCTGGATC<br>GAGGATATTAT                   |                                                                        |
| <b>OTY140</b> | ATCCTCGATCCAGCGAACATTCCCC<br>TCAACTGAAA                    |                                                                        |
| <b>X67</b>    | TAACCCAAAGGCTAATCGTG                                       | RT-PCR primers for Actin                                               |
| <b>X68</b>    | GTAGTCTCGTGGATTCTCTGC                                      |                                                                        |
| <b>OKX51</b>  | CGGTCTAGAGGGCCCTGACGAGCT<br>TTCGATGCAGTG                   | RT-PCR primers for PDS                                                 |
| <b>OKX52</b>  | CGGAGATCTGGCGGCCATGGACA<br>TTTATCACAGGAACTC                |                                                                        |
| <b>OTY77b</b> | GTGCAGGGTCCGAGGT                                           | Universal reward primer<br>for all miRNA end-point<br>stem-loop RT-PCR |
| <b>OTY169</b> | GTTGGCTCTGGTGCAGGGTCCGAG<br>GTATTCGCACCAGAGCCAACGCCC<br>CA | RT primer for amiR-PDS                                                 |
| <b>OTY170</b> | CCGGCTCAACATAGACTGAT                                       | Forward primer for                                                     |

|               |                                                            |                                  |
|---------------|------------------------------------------------------------|----------------------------------|
|               |                                                            | amiR-PDS                         |
| <b>OTY173</b> | GTTGGCTCTGGTGCAGGGTCCGAG<br>GTATTCGCACCAGAGCCAACGTGC<br>GC | RT primer for amiR-Su            |
| <b>OTY174</b> | GGGCGTAAGATCTAACCGTG                                       | Forward primer for<br>amiR-Su    |
| <b>OTY175</b> | GTTGGCTCTGGTGCAGGGTCCGAG<br>GTATTCGCACCAGAGCCAACCACC<br>AA | RT primer for<br>amiR-CLA1       |
| <b>OTY176</b> | CCGGCTGTATCTGAAACAAC                                       | Forward primer for<br>amiR-CLA1  |
| <b>OTY177</b> | GTTGGCTCTGGTGCAGGGTCCGAG<br>GTATTCGCACCAGAGCCAACCTGG<br>TG | RT primer for<br>amiR-SGT1       |
| <b>OTY178</b> | CCGGCTCGGTGCTAAACTAG                                       | Forward primer for<br>amiR-SGT1  |
| <b>OTY78b</b> | GTTGGCTCTGGTGCAGGGTCCGAG<br>GTATTCGCACCAGAGCCAACGTGC<br>TC | RT primer for miR156b            |
| <b>OTY79</b>  | GCGGCGGTGACAGAAGAGAGT                                      | Forward primer for<br>miR156b    |
| <b>OTY167</b> | GTTGGCTCTGGTGCAGGGTCCGAG<br>GTATTCGCACCAGAGCCAACGGGG<br>GA | RT primer for miR165a            |
| <b>OTY168</b> | TCGCTTCGGACCAGGCTTCA                                       | Forward primer for<br>miR165a    |
| <b>OTY67</b>  | GGGACAAGACGAGATGAAGT                                       | RT-PCR primers for SU            |
| <b>OTY68</b>  | ACCCGAACCAATTAGGATAA                                       |                                  |
| <b>OTY98</b>  | GTAATGGCTCCTTCCGATGA                                       | RT-PCR primers for<br>CLA1       |
| <b>OTY99</b>  | AGCAACATGAGACCCGAAAC                                       |                                  |
| <b>X1</b>     | CGCCGTTGACCTTTACACTC                                       | RT-PCR primers for<br>SGT1       |
| <b>X2</b>     | CACCACCTCCTCTGGCTTCT                                       |                                  |
| <b>OTY69</b>  | GTCCTGGTATTATTCCTTCC                                       | RT-PCR primers for<br>TC7909     |
| <b>OTY70</b>  | AACACGATGCCATTATTGA                                        |                                  |
| <b>OTY71</b>  | AGTTCTGCAAGGTTACCCAC                                       | RT-PCR primers for<br>TC9706     |
| <b>OTY72</b>  | CCGTCAACAGACAGCCTCA                                        |                                  |
| <b>OTY96</b>  | GTTAGCAGCACGACCACAGA                                       | RT-PCR primers for<br>DH-ZIP III |
| <b>OTY97</b>  | TCTATTGTCCCTCCATTGCC                                       |                                  |

## Supplementary Method S1. The protocol for MIR VIGS.

Detail protocol for designing, cloning amiRNAs and MIR VIGS analysis.

### 1. Artificial microRNA design.

First, a web application called Web MicroRNA Designer (WMD) is used to design artificial microRNAs (amiRNAs). The new address of WMD website is <http://wmd3.weigelworld.org/cgi-bin/webapp.cgi>. On its “Designer” page, type the identified gene name (see Note 1) of the gene of interest (e.g. TC14913 for *Nicotiana benthamiana phytoene desaturase* gene) into the “Target genes” field or input the sequence of the gene in a FASTA format if the gene could not be found in transcript library of WMD (e.g. GFP or other non-plant genes). Choose the corresponding sequence library in the “Genome” field (e.g. *Nicotiana benthamiana* EST NbGI-3.0 or *Nicotiana tabacum* EST NtGI-4.0 for genes from *Nicotiana benthamiana*). Input the E-mail address in the “Email” field and press the “Submit” button. Candidate amiRNA sequences will be suggested by WMD through email.

Second, screen the candidate miRNA sequences by “WMD Target Search (<http://wmd3.weigelworld.org/cgi-bin/webapp.cgi?page=TargetSearch;project=stdwmd>)” to find their potential target gene and only the candidate amiRNA that only targets the gene of interest will be chosen for further cloning. This step will reduce potential off-target effect of amiRNA.

Third, “WMD Oligo” is used to design the primers for amplifying individual amiRNA gene using *Arabidopsis* miR319a precursor gene (see Note 2) as backbone (<http://wmd3.weigelworld.org/cgi-bin/webapp.cgi?page=Oligo;project=stdwmd>). Paste the chosen amiRNA sequence into the “MicroRNA sequence” field and press “Submit” button. Four special primers (I, II, III, and IV) are provided by for each designed amiRNAs. In addition, Oligo A (5'-CTGCAAGGCGATTAAGTTGGGTAAC-3') and B (5'-GCGGATAACAATTTACACAGGAAACAG-3') are designed, which are located at 5'- or 3'-end of miR319a precursor gene.

## 2. Cloning of amiRNA genes

Six oligoes (four special oligoes, I, II, III and IV, and two universal oligoes, A and B) and the plasmid pRS300 (kindly provided by Dr. Detlef Weigel) are used to PCR amplify amiRNA gene (see Note 3). Two round of PCR are needed to produce the final amiRNA-containing construct. In the first round of PCR, three different reactions are performed simultaneously using plasmid pRS300 as template and primer sets A and IV, II and III, or I and B, respectively. In the second round of PCR, these three PCR products are mixed (see Note 4) and used as template to amplify the full-length amiRNA gene using oligos A and B. The final PCR products are digested by *KpnI* and *XbaI*, and ligated into *KpnI-XbaI*-digested pCVA vector.

## 3. Agroinfiltration and MIR VIGS analysis

Transform the amiRNA-containing pCVA and pCVB separately into *Agrobacterium* GV3101 strain using freeze-thaw method. Grow this two *Agrobacterium* separately in 5mL of Luria-Bertani medium containing antibiotics (30mg/L rifampicin, 50 mg/L gentamycin and 50 mg/L kanamycin) overnight in a 28°C shaker. Harvest the two *Agrobacterium* cultures, re-suspend in infiltration buffer (10 mM MgCl<sub>2</sub>, 10 mM MES, and 200 mM acetosyringone) and adjust to an O.D.<sub>600</sub>=2.0. Keep the cultures at room temperature for 3 to 4 h, and mix at 1:1 ratio just before infiltration. Grow *Nicotiana benthamiana* plants in pots at 25°C under 16 h light/8 h dark cycle to six-leaf stage. Infiltrate the agrobacterium culture mix into the stem nodes and petioles of plants using a 1-mL syringe. Plant phenotype is observed since 2 weeks post agroinoculation

**Note 1:** The identified gene name can be found out by using the blast tool in the WMD site. If no result is found in blast, just input the sequence of the gene in a FASTA format into the “Target genes” field.

**Note 2:** The backbone sequence of Arabidopsis miR319a precursor gene (NC\_003075, 12353276-12352872) is:

*Xba*I -CCATGGCGATGCCTTAAATAAAGATAAACCCAAAATGTTAATTTTACCAGAACTATATAT  
ACGAAGGCAGCATATATGTCACTTAGTGGATCAAGCATGTTTTTGTGCAGGAAAGATTAATCAAG  
AAAATTGGAATACAAAAGAGAGANNNNNNNNNNNNNNNNNNNNNTCAAAGAGAATCAATGATCCA  
ATTTGTCTACCGCATCATTCAATCATTTAACGAGTCTAGTTTGAATTTTGGCGACTCGGTATTTG  
GATGAATGAGTCGGAAGCTAATTGAATCATATCACGACCTGTGANNNNNNNNNNNNNNNNNNNNN  
TCTACATATATATTCCTAAAACATCAATTCAAACAGCGAGTATTAAGTGTATGAACATGTGTAA  
TATGCGTCCGAGCGTGTGTTTG-*Kpn*I

The region in purple is the 21 nt amiRNA and the region in green is the 21 nt amiRNA\*.

**Note 3:** pRS300 is a pBluescript-based plasmid containing Arabidopsis miR319a precursor gene. Any two oligoes flanking the MCS would be suitable as universal oligoes.

**Note 4:** We recommend performing gel recovery to the PCR products before mix or using *Dpn*I to digest residual plasmid pRS300 in the mix.
